# Supplementary material for: Coronin1C SUMOylation modulates filopodia formation, neuritogenesis, and neuronal differentiation
Source: Research Square preprint supplement (doi:10.21203/rs.3.rs-7742445/v1), 2025-11-04
Supplement: Supplementary file [file f368a3944b7451125225b185.pdf]

# Coronin1C SUMOylation modulates filopodia formation, neuritogenesis, and neuronal differentiation

Garima Joshi<sup>1</sup>, Harsh Vardhan Singh<sup>1</sup> and Ram Kumar Mishra<sup>1</sup>

<sup>1</sup>Department of Biological Sciences, Indian Institute of Science Education and Research Bhopal

Bhopal, Madhya Pradesh, India-462066

## Supplementary information

| Position | Sequence               | Domain    |
|----------|------------------------|-----------|
| K19      | KFRHVFQAVKNDQCYDDIRV   | N-term    |
| K197     | SLICTASKDKKVRIVIDPRKQE | WD Domain |
| K329     | KRGLDVNKCEIARFF        | C-term    |
| K403     | GYIPGKNRDLKVVKKNILDSK  | C-term    |
| K413     | KKNILDKPTANKKC         | C-term    |
| K440     | ASVQNEAKLDEILKE        | C-term    |
| K464     | NQDERISKLEQQMAK        | C-term    |

Table S1 | *in silico* prediction of COR1C SUMO sites

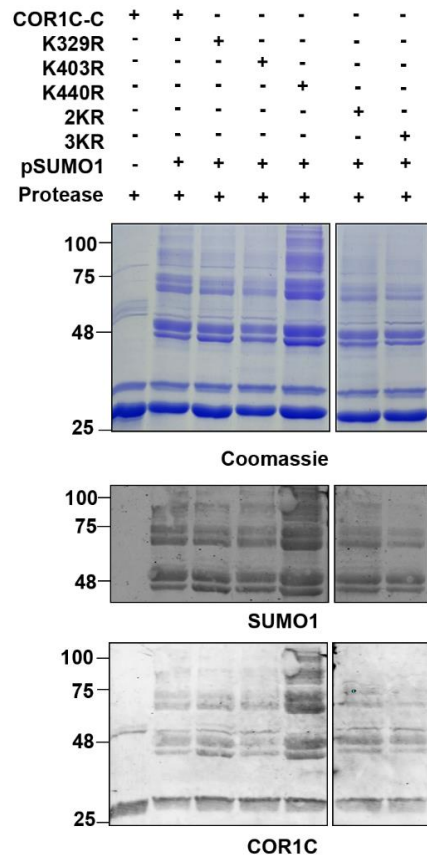

**Fig. S1 | COR1C is SUMOylated at multiple lysines in its C-terminus.**

SDS-PAGE analysis of *in bacto* SUMOylation reaction with GST-COR1C-C wild-type and mutant post digestion with PreScission protease to produce untagged COR1C-C (modified and unmodified, upper panel). Immunoblotting of samples as upper panels with anti-SUMO1 (middle panel) and anti-COR1C (lower panel) antibodies.

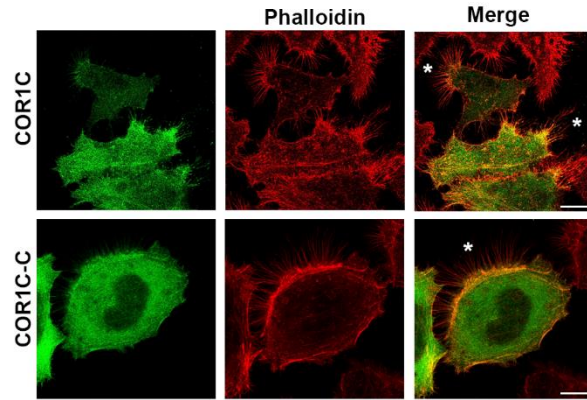

**Fig. S2 | The carboxy-terminus of Coronin1C localizes at the filopodial projections.**

HeLa cells transfected with GFP-COR1C and GFP-COR1C-C stained with Phalloidin-647. Scale bar - 10  $\mu$ m. White stars denote the filopodial projections.

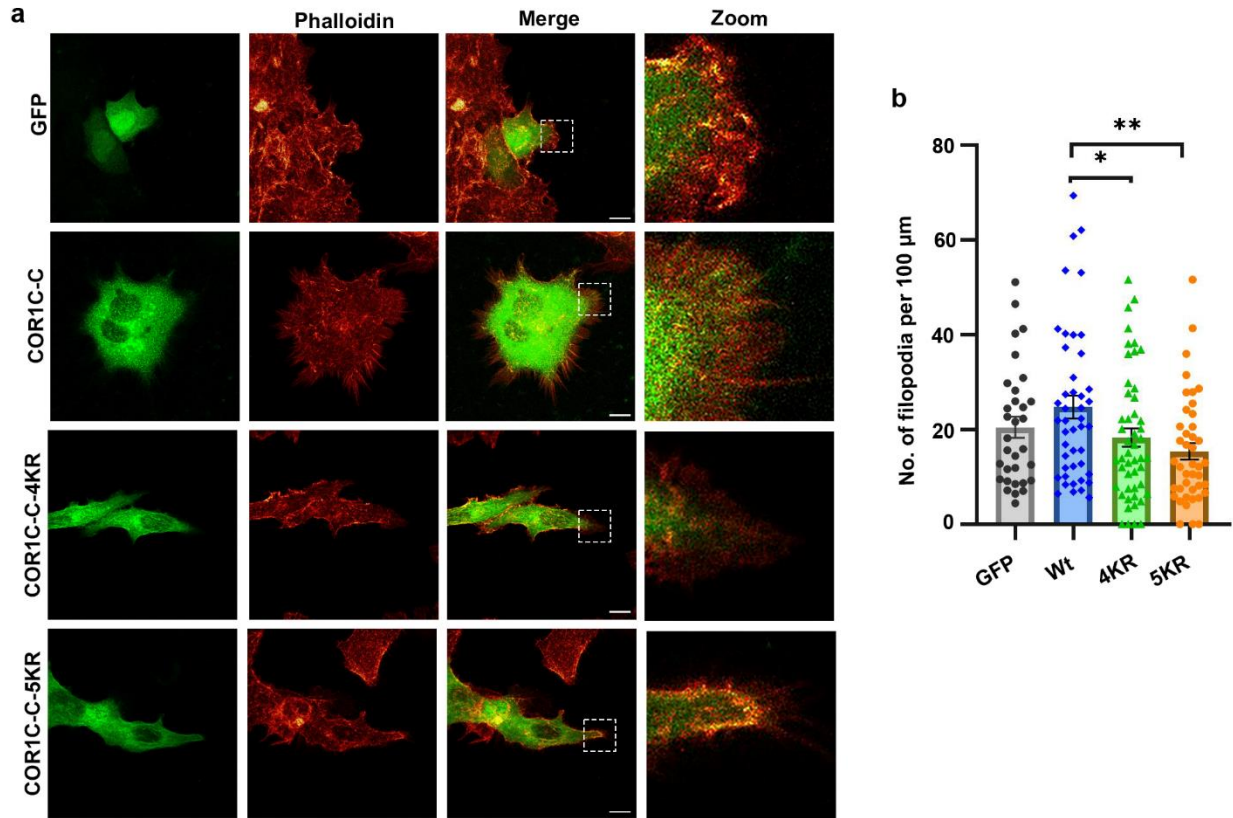

**Fig. S3 | COR1C-C SUMOylation is critical for filopodia formation in cells.**

**a** CLSM imaging of MCF7 cells transfected either with GFP-tagged COR1C-C, COR1C-C-4KR, or COR1C-C-5KR. Cells were stained with Phalloidin-647. Dotted-box highlights filopodial structures in the leading edges, as shown in the zoom. **b** Filopodial projections as seen in (a) were quantified using the FiloQuant plugin of ImageJ (~ 50 cells were analyzed in three independent experiments). Statistical analysis was performed using an unpaired t-test; (\*) and (\*\*) indicate statistical significance with a p value of 0.0389 and 0.0026. Scale bar - 10 μm.

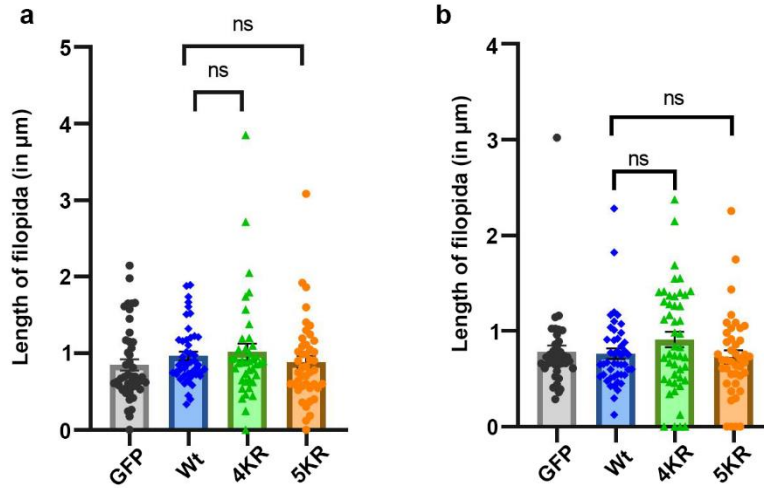

**Fig. S4 | COR1C-C SUMOylation does not affect filopodia length in cells.**

Quantification of the length of filopodial projections measured from HeLa cells **(a)** and MCF7 cells **(b)**, as shown in Figure S3, was performed using the FiloQuant plugin of ImageJ (~ 50 cells were analyzed in three independent experiments). Statistical analysis was performed using an unpaired t-test.

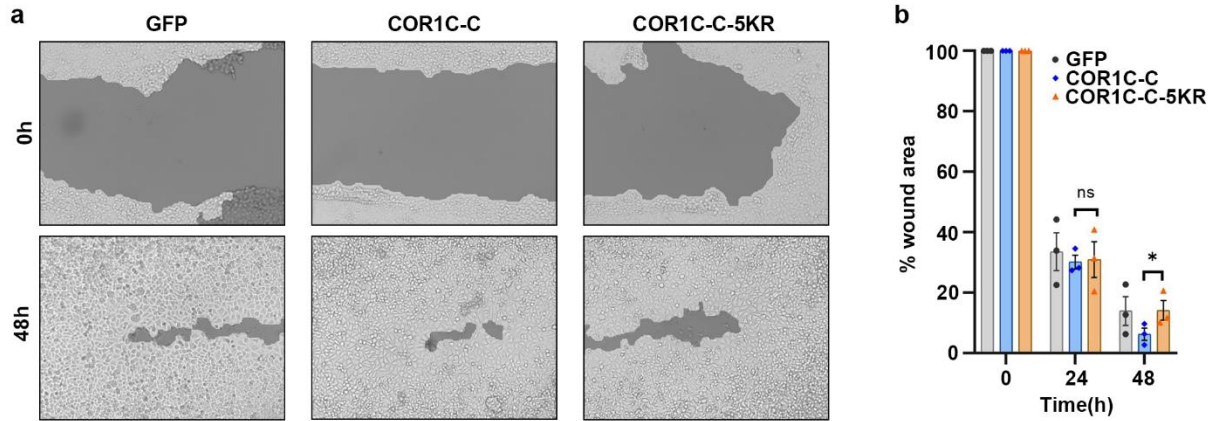

**Fig. S5 | COR1C SUMOylation is required for efficient cellular migration.**

**a** Representative image of the wound healing assay performed with HeLa cells expressing GFP, GFP-COR1C-C, or GFP-COR1C-C-5KR. Images were captured at 10x magnification using an inverted microscope. **b** Quantification of wound area closure using TScratch software. Images are representative of n=3 experiments. Data was analysed by using a paired t-test, and (\*) indicates statistical significance with a p-value of 0.0398.
